# Supplementary material
Source: ML conference proceedings conference paper supplement (https://openaccess.thecvf.com/content/CVPR2026/html/Zhang_EVA_Efficient_Reinforcement_CVPR_2026_paper.html)
Supplement: Supplementary file 1 [file Zhang_EVA_Efficient_Reinforcement_CVPR_2026_supplemental.pdf]

# EVA: Efficient Reinforcement Learning for End-to-End Video Agent

Yaolun Zhang\* Ruohui Wang\* Jiahao Wang\*,‡ Yepeng Tang Xuanyu Zheng  
Haonan Duan Hao Lu Hanming Deng Lewei Lu†

SenseTime Research

## 1. Appendix

### 1.1. Why plan before perception

The core philosophy that distinguishes EVA from prior video-agent systems is its planning-before-perception paradigm. This new agentic video-understanding framework offers several key advantages.

**Avoiding visual misguidance.** Under the traditional perception-first paradigm, uniformly sampled frames often contain irrelevant or noisy actions that mislead the model during reasoning. In contrast, planning-first allows the agent to construct a textual plan that clarifies its intent before interacting with the video. This plan serves as a guiding prior, steering the agent toward the visual evidence that is truly required by the question and preventing distraction from irrelevant content. As illustrated in Figure 1, EVA first formulates a plan that guides its subsequent observation process, enabling it to inspect the video with explicit purpose. Other video agents, however, are forced to rely solely on uniformly sampled frames, which frequently introduce sampling bias. Such bias can distort the agent’s perception and lead to incorrect conclusions. Without an explicit plan, even agents equipped with frame-selection tools cannot reliably decide when and how to use them.

**Saving visual tokens.** For long videos, sampling the entire content at high resolution is prohibitively expensive. In many cases, only a small temporal segment or a low-resolution preview is sufficient for answering the query. Planning-before-perception naturally reduces visual-token usage by enabling the agent to identify which parts of the video matter, thereby improving both efficiency and accuracy.

**Active perception rather than passive observation.** Traditional perception–reasoning pipelines inherently oper-

ate under a passive observation regime, where the model is restricted to whatever frames are provided to it and therefore lacks the ability to control what visual evidence should be acquired. Such passivity fundamentally limits reasoning: when the observation is fixed, the model’s understanding is constrained by noise, sampling bias, and irrelevant visual content. In contrast, agentic intelligence requires an active perceptual process in which the system explicitly determines what information is necessary, decides how to obtain it, and selectively interacts with the environment through tool calls to gather targeted visual evidence. The planning-before-perception paradigm enables precisely this mode of active perception. By formulating an explicit plan prior to observing the video, the agent first establishes a hypothesis about what information is needed for solving the task, and then acquires only the relevant content to verify or refine this hypothesis. This deliberative loop—intention formation followed by targeted perception—allows the agent to transcend passive frame consumption and instead engage in purposeful, goal-driven visual information gathering, which is essential for robust and scalable video understanding.

### 1.2. Data Pipeline Details

We developed a Multi-Agent Data Pipeline to generate a high-quality supervised fine-tuning dataset, as detailed in Figure 2. Upon receiving a query, an Executor agent analyzes the current context—consisting of the initial query and, in subsequent rounds, relevant video frames—to evaluate potential actions and their expected outcomes. The Executor then optimizes action parameters and determines whether sufficient information exists to submit a final answer. Proposed tool calls are further scrutinized by a Reflective Thinker, which assesses the reasonableness of the parameters. Following this multi-turn loop, successful trajectories are archived in an Experience Bank. These trajectories are retrieved based on query similarity to guide the Executor, thereby enhancing its success rate in future iterations.

---

\*Equal contribution ‡Project Lead †Corresponding author:  
luotto@sensetime.com Our Code and model are at [this link](#).

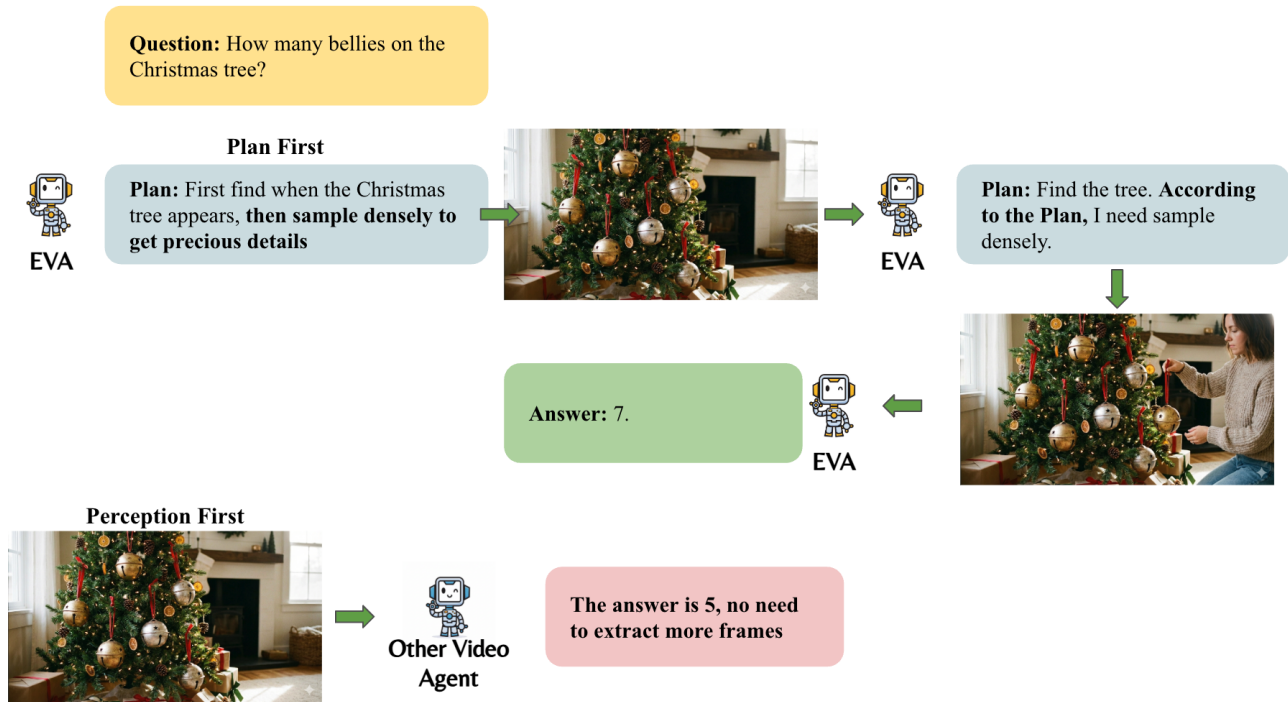

Figure 1. The advantage of plan before perception matters

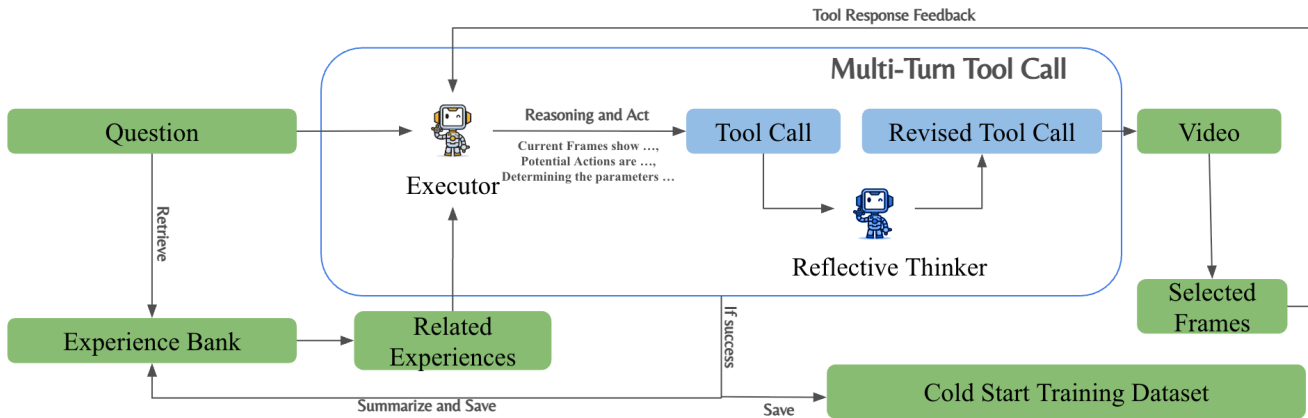

Figure 2. Cold Start Data Pipeline

### 1.3. EVA Behavior Analysis

#### How the EVA attribute its computation in each round.

To understand why the EVA schema surpasses both the baseline approaches and the traditional agentic paradigm, we further analyze the distribution of visual-token usage across rounds, which highlights the autonomous behavior of our agent compared with other methods. We compute the visual-token attribution for EVA and contrast it with the baselines, which allocate all visual tokens in the first round. Figure 3 illustrates the distributions of frames (nframe × re-

size), nframes, resize, and time range over different rounds. From these results, we observe that EVA initially explores the video using a large number of frames and a long temporal span. However, in the second round, both nframes and the time range drop sharply, while the resize factor continues to increase, indicating that EVA zooms in to gather more fine-grained information. This progression clearly demonstrates EVA’s agentic decision-making capability.

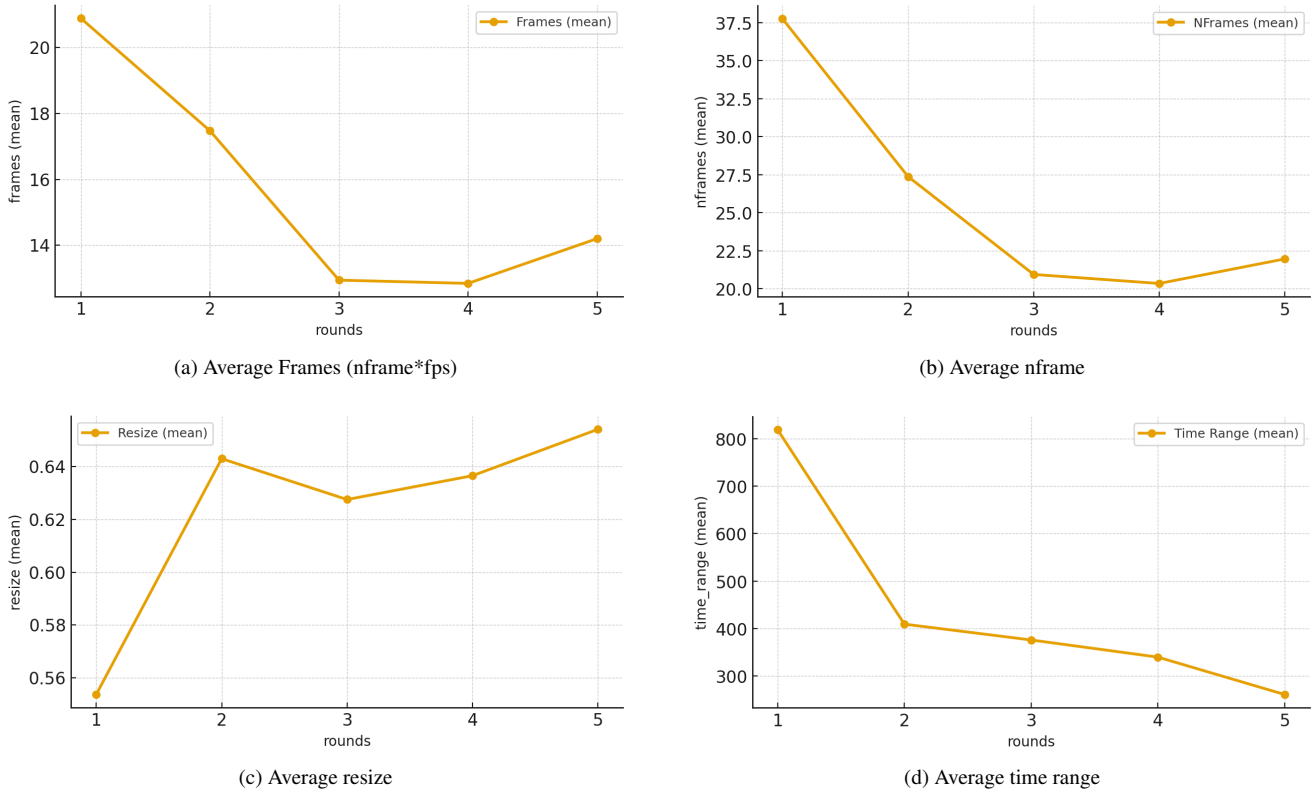

Figure 3. EVA statistics across rounds.

#### 1.4. Evaluation on Non-Multi-Choice Benchmark

ELV-Halluc [1] is a benchmark designed to evaluate semantic aggregation hallucination (SAH) in multimodal large language models (MLLMs) using in-video and out-video QA pairs. The SAH ratio is defined as:

$$\text{SAH Ratio} = \frac{\text{OutAcc} - \text{InAcc}}{1 - \text{InAcc}}$$

SAH denotes the phenomenon where a model accurately perceives frame-level semantic information but generates hallucinations during the aggregation of this information into event-level semantics. This unique failure mode necessitates that models first achieve precise frame-level visual perception while demonstrating robust temporal localization capabilities—particularly proficiency in understanding temporal sequences of video events.

Table 1 presents the key experimental results on the ELV-Halluc benchmark. Specifically, our proposed EVA model achieves the highest Overall Accuracy among all compared models and reduces the SAH-ratio from 8.8% to 5% in contrast to Qwen2.5-VL-7B. Such superior performance fully demonstrates the remarkable capability of EVA: on one hand, our agentic tool-call framework provides the model with more visual details during the required time intervals,

which effectively enhances the model’s frame-level perception ability; on the other hand, the reinforcement learning (RL)-based training paradigm requires the model to accurately locate the timestamps that necessitate tool calls during the training process, thereby consolidating the model’s mapping ability between semantics and temporal sequence.

#### 1.5. Evaluation Details

We use `vLLM` to serve EVA. Our frame selection tool extracts frames in `jpg` format, which are then fed into the next round of processing. All evaluations are conducted using the original video resolution (720p).

For the baselines, we evaluate Qwen2.5-VL with video input. We set `min_pixels` to  $1280 \times 28 \times 28$  and `max_pixels` to  $16384 \times 28 \times 28$ .

#### 1.6. Prompts

We show the prompts for the reflective thinker in the section, revealing how we construct high-quality training data.

**Prompt for the Reflective Thinker** Prompt 4 is the prompt for the reflector.

| Models                      | LLM size | Visual Details |      |       | Object |      |       | Action |      |       | Declarative Content |      |       | Avg Acc $\uparrow$ | Avg Diff. $\downarrow$ | SAH Ratio $\downarrow$ |
|-----------------------------|----------|----------------|------|-------|--------|------|-------|--------|------|-------|---------------------|------|-------|--------------------|------------------------|------------------------|
|                             |          | In.            | Out. | Diff. | In.    | Out. | Diff. | In.    | Out. | Diff. | In.                 | Out. | Diff. |                    |                        |                        |
| <b>Closed Source Models</b> |          |                |      |       |        |      |       |        |      |       |                     |      |       |                    |                        |                        |
| GPT-4o                      | /        | 8.5            | 14.2 | 5.7   | 16.3   | 17.5 | 1.2   | 13     | 15.2 | 2.2   | 13.3                | 12.2 | -1.1  | 13.7               | 2                      | 2.2                    |
| <b>Open Source Models</b>   |          |                |      |       |        |      |       |        |      |       |                     |      |       |                    |                        |                        |
| Qwen2.5VL-3B                | 3B       | 2.2            | 10.5 | 8.3   | 7.7    | 13.8 | 6.1   | 5      | 8    | 3     | 6                   | 6    | 0     | 7.4                | 4.3                    | 4.5                    |
| LLaVA-OV-7b                 | 7B       | 4.5            | 16.5 | 12    | 6.75   | 11.5 | 4.75  | 3.5    | 9.5  | 6     | 6                   | 7    | 1     | 8.1                | 5.9                    | 6.2                    |
| Qwen2.5VL-7b                | 7B       | 10.2           | 26   | 15.8  | 17.5   | 30.7 | 13.2  | 13     | 20.7 | 7.7   | 16.8                | 10.5 | -6.3  | 18.1               | 7.6                    | 8.8                    |
| InternVL3-8B                | 7B       | 12.5           | 19.5 | 7.0   | 14.5   | 19.5 | 5.0   | 13.5   | 20.5 | 7.0   | 12.8                | 17.7 | 4.9   | 16.3               | 5.9                    | 6.8                    |
| InternVL3-14B               | 14B      | 17.5           | 24.5 | 7.0   | 22.8   | 24.5 | 1.7   | 16.3   | 17.7 | 1.4   | 15.2                | 15.5 | 0.3   | 19.2               | 2.6                    | 3.1                    |
| Qwen2.5VL-32B               | 32B      | 16.5           | 24.5 | 8.0   | 21.7   | 24.5 | 2.8   | 17.2   | 15.0 | -2.2  | 15.2                | 7.2  | -8    | 17.7               | 0.1                    | 0.2                    |
| InternVL3-38B               | 32B      | 25.3           | 29   | 3.7   | 24.2   | 28   | 3.8   | 24     | 30   | 6     | 24.5                | 24.2 | -0.3  | 26.1               | 3.3                    | 4.3                    |
| <b>Our Model</b>            |          |                |      |       |        |      |       |        |      |       |                     |      |       |                    |                        |                        |
| EVA                         | 7B       | 21.7           | 27.6 | 5.9   | 24.1   | 25.3 | 1.2   | 27.6   | 32.3 | 4.7   | 23.2                | 26.5 | 3.3   | <b>26.2</b>        | 3.8                    | 5.0                    |

Table 1. Main results on ELV-Halluc. Diff. denotes the gap between in-video and out-video accuracy. All accuracies are shown as percentages.

```

You are the REFLECTOR agent that audits the EXECUTOR agent's planning and the current tool plan, and fixes
mistakes before the tool is executed.

You will be given:
- Video duration and question

- The EXECUTOR's last round (Round N-1) thoughts including Summary/Analysis/Plan and its tool call JSON, with
  computed stats (fps and visual budget)
- The newly proposed tool call for Round N, with computed stats

Your job: decide whether the Round N plan violates any of the following rules. If any rule is violated, output a
corrected Analysis, Plan, and tool call JSON. Keep the Summary from Round N UNCHANGED (the caller will stitch
it back). If there is NO issue, think first then output <NO_CHANGE>.

Rules to check:

1) If the global sampling did NOT find information, do NOT randomly select a video segment (e.g., middle part).
   Instead, increase the global sampling density and resolution AGGRESSIVELY: raise resize from ~0.1 to at least
   0.5; increase nframes by at least 3x, while keeping fps ≤ 1.

2) If the model want to focus on a specific time range according to the visual information, that is correct and
   just do not change it.

2) If a specific segment was already densely sampled (fps == 1) in Round N-1, do NOT continue dense sampling on
   the same segment next; instead increase global sampling density/resolution to search globally.

3) If the visual budget in a tool call is too small (< 15), increase it to at least 15 by adjusting resize and/or
   nframes.
4) If fps > 1, set fps = 1 by reducing nframes to at most end_time - start_time.

5) If there is no problem, after thinking output <NO_CHANGE> as the only content.

```

Figure 4. Reflector Prompt

## 1.7. Case Visualization

### **Success Case: Multi-turn Grounding and Zoom-In**

Figure 5 shows a success case. Given the query and the video length, the EVA carefully ponders several potential actions, including dense sampling, sparse sampling, and keyframe extraction. It then thinks about what new information each action will bring and what they will cost. Finally, it generates an efficient tool-call to get a brief overview of the video. In the second round, the EVA generates a new tool call based on the first-round frames, allocating enough visual budget to the corresponding segment.

**Success Case: Direct Dense Sampling** Given the query, the EVA autonomously plans and figures out the most efficient way to find the correct answer. Some Video-QA questions do need dense and high-resolution frames, just like what baseline passive MLLMs do. In these cases, the EVA will go back to the traditional unified sampling method and generate the correct answer after the first tool call. Figure 6 shows an example.

## References

- [1] Hao Lu, Jiahao Wang, Yaolun Zhang, Ruohui Wang, Xuanyu Zheng, Yepeng Tang, Dahua Lin, and Lewei Lu. Elv-halluc: Benchmarking semantic aggregation hallucinations in long video understanding, 2025. [3](#)

**SYSTEM**  
Use Frame Select Tool to Analyze the video and generate an answer to the question.

**USER**  
Video Length: 397 seconds. Original video resolution: 720p.  
What triggers the 'GOAAAAAL!!' animation during gameplay?

**ASSISTANT**  
*To tackle this, I first need to understand what the question is asking: I'm looking for the specific moment that triggers the 'GOAAAAAL!!' animation during gameplay. This means I have to find a frame that clearly shows this animation and identify its cause. Next, I consider all the potential strategies at my disposal. There's dense sampling, sparse sampling, keyframe extraction, and hybrid approaches like the one I'm leaning towards—customized sampling combined with aggressive resizing. Each method has its own set of arguments that I can tweak to suit my needs better. Dense sampling would give me lots of frames across the entire video, which might be useful for spotting the exact moment. However, it could also be overwhelming and computationally expensive. Keyframe extraction aims to cover the essence of the video by focusing on significant frames, but it may not provide enough detail about the gameplay nuances. Sparse sampling might give me an overview of the whole video.*

```
{  
  "tool": "frame_select",  
  "arguments": {  
    "start_time": 0, "end_time": 397, "nframes": 10, "resize": 0.1  
  }  
}
```

**USER (Tool Response: Round 1)**



If more information is needed, call the frame selection tool again. Question: What triggers the 'GOAAAAAL!!' animation during gameplay?

**ASSISTANT**  
*From the low-resolution frames provided, we see various gameplay scenes involving characters and text references like "GOAAAAAL!!". However, the exact trigger for the 'GOAAAAAL!!' animation isn't clear. The scenes with players positioned near goals or scoring actions seem promising leads. To pinpoint the exact moment the 'GOAAAAAL!!' animation occurs, I will select a segment of the video around frames showing scoring attempts or celebratory moments. A closer inspection of the given frames suggests that the frame at [03:24] shows a character near a goal post, potentially just before scoring. Therefore, focusing on the segment around this frame for a higher-resolution analysis makes sense. I'll select a segment from [03:20] to [04:10], capturing 100 frames at a higher resolution (resize=0.4) to get more detail without overloading resources. This should help identify any subtle cues leading up to the 'GOAAAAAL!!' animation.*

```
{  
  "tool": "frame_select",  
  "arguments": {  
    "start_time": 200, "end_time": 250, "nframes": 100, "resize": 0.4  
  }  
}
```

**USER (Tool Response: Round 2)**

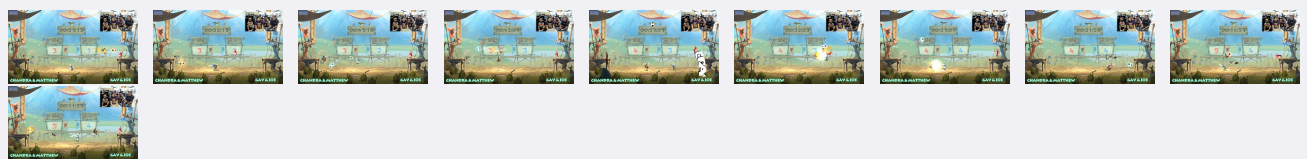

(... Uniformly sampled 10 frames from 100 frames: indices 0, 10, 20, ..., 90 ...)

If more information is needed, call the frame selection tool again. Question: What triggers the 'GOAAAAAL!!' animation during gameplay?

**ASSISTANT**  
*The increased resolution has provided clearer visuals, particularly highlighting the 'GOAAAAAL!!' animations that coincide with successful goals. Observing the frames, the animation appears when a character scores a goal, as indicated by the ball entering the opposing team's goal area. The transition to the celebration scene, including the activation of the 'GOAAAAAL!!' text and confetti, corresponds directly to the ball crossing the goal line. Based on the gameplay analyzed so far, the key triggers for the 'GOAAAAAL!!' animation appear to be:  
1. The ball reaching the opponent's goal area. 2. The scoring team's character celebrating the goal.  
Given these observations, no further analysis is necessary since the pattern indicating how the animation is triggered is evident. The frames demonstrate that the animation is directly linked to scoring actions within the game.*

**Answer:** The 'GOAAAAAL!!' animation is triggered when the ball successfully enters the opponent's goal area, signaling a successful score in the game. The frames show that the celebration and animation activate immediately after the ball crosses the goal line, confirming this as the primary trigger.

Figure 5. Three-Round Case

SYSTEM

Use Frame Select Tool to Analyze the video and generate an answer to the question.

USER

Video Length: 1218 seconds. Original video resolution: 384p.

What was the process followed by the camera wearer to set up the sewing machine during the holiday-themed Scene 6?

- A: Set up the sewing station, placed tools on the table, connected the machine to power, threaded the needle, and began sewing.
- B: Positioned sewing materials, removed the cover, connected power cables, wound the bobbin, threaded the machine, and powered on.
- C: Cleared the workspace, uncovered the sewing machine, connected necessary cables, adjusted the needle, and wound the bobbin.
- D: Moved to the table, arranged sewing items, uncovered the machine, connected cables, powered on, prepared and threaded the machine.

ASSISTANT

To answer the user's question about the process followed by the camera wearer to set up the sewing machine during the holiday-themed Scene 6, I need to analyze the video content. Since the video length is 1218 seconds, I'll start by sampling frames from the entire video to get an overview. This should help me identify the relevant scene and the process described in the options.

```
{  
  "tool": "frame_select",  
  "arguments": {  
    "start_time": 0,  
    "end_time": 1218,  
    "nframes": 60,  
    "resize": 0.5  
  }  
}
```

USER (Tool Response)

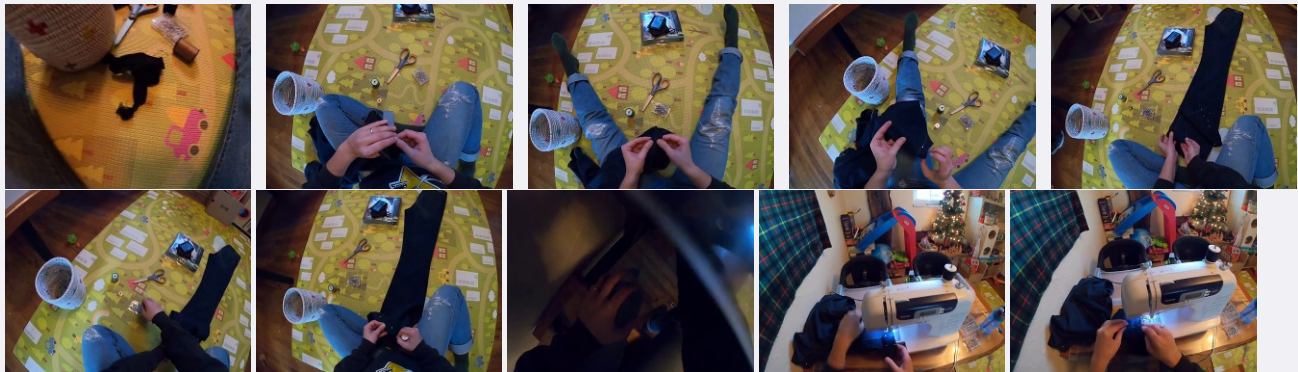

(... Displaying first 10 of 60 frames ...)

If more information is needed, call the frame selection tool again.

Question: What was the process followed by the camera wearer to set up the sewing machine during the holiday-themed Scene 6?

- A: Set up the sewing station, placed tools on the table, connected the machine to power, threaded the needle, and began sewing.
- B: Positioned sewing materials, removed the cover, connected power cables, wound the bobbin, threaded the machine, and powered on.
- C: Cleared the workspace, uncovered the sewing machine, connected necessary cables, adjusted the needle, and wound the bobbin.
- D: Moved to the table, arranged sewing items, uncovered the machine, connected cables, powered on, prepared and threaded the machine.

ASSISTANT

The video shows the person setting up the sewing machine by connecting cables, removing the cover, and threading the machine. The process aligns with option D. **Answer:**

D

Figure 6. Two-Round Case
